# Supplementary material for: External validation of LCR1-LCR2, a multivariable HCC risk calculator, in patients with chronic HCV
Source: PubMed Central journal article supplement — JHEP Rep. 2021 Apr 24;3(4):100298. doi: 10.1016/j.jhepr.2021.100298 (PMC8187244; doi:10.1016/j.jhepr.2021.100298), 2021-04-24
Supplement: mmc1.pdf [file mmc1.pdf]

## External validation of LCR1-LCR2, a multivariable HCC risk calculator, in patients with chronic HCV

Thierry Poynard<sup>1,2</sup>, Jean Marc Lacombe<sup>3</sup>, Olivier Deckmyn<sup>4</sup>, Valentina Peta<sup>2,4</sup>, Sepideh Akhavan<sup>1</sup>, Victor de Ledinghen<sup>5</sup>, Fabien Zoulim<sup>6</sup>, Didier Samuel<sup>7</sup>, Philippe Mathurin<sup>8</sup>, Vlad Ratziu<sup>1,2</sup>, Dominique Thabut<sup>1,2</sup>, Chantal Housset<sup>2</sup>, H el ene Fontaine<sup>9</sup>, Stanislas Pol<sup>9</sup>, Fabrice Carrat<sup>3</sup>, for the HECAM consortium and the ANRS CO22 Hepather cohort\*

### Table of contents

|                                              |    |
|----------------------------------------------|----|
| File S1. ANRS-AFEF Hepather study group..... | 2  |
| Fig. S1.....                                 | 4  |
| Fig. S2.....                                 | 6  |
| Fig. S1.....                                 | 7  |
| Table S1.....                                | 8  |
| Table S2.....                                | 10 |
| Table S3.....                                | 13 |
| Table S4.....                                | 14 |
| Table S5.....                                | 21 |
| Table S6.....                                | 22 |
| Table S7.....                                | 24 |
| Table S8.....                                | 25 |
| Table S9.....                                | 27 |
| Table S10.....                               | 30 |

## File S1. ANRS-AFEF Hepather study group

Delphine Bonnet, Virginie Payssan-Sicart, Chloe Pomes (CHU Purpan, Toulouse, France), François Bailly, Marjolaine Beaudoin Dominique Giboz, Kerstin Hartig-Lavie, Marianne Maynard (Hospices Civils de Lyon, Lyon, France), Eric Billaud, David Boutoille, Morane Cavellec, Marjorie Cheraud-Carpentier (Hôpital Hôtel-Dieu, Nantes, France), Isabelle Hubert, Jaouad Benhida, Adrien Lannes, Françoise Lunel, Frédéric Oberti (CHU Angers, Angers, France), Nathalie Boyer, Nathalie Giuily, Corinne Castelnaud, Giovanna Scoazec (Hôpital Beaujon, Clichy, France), Aziza Chibah, Sylvie Keser, Karim Bonardi, Anaïs Vallet-Pichard, Philippe Sogni (Hôpital Cochin, Paris, France), Juliette Foucher, Jean-Baptiste Hiriart, Amy Wilson, Sarah Shili, Faiza Chermak (Hôpital Haut-Lévêque, Pessac, Bordeaux, France), Christelle Ansaldi, Nisserine Ben Amara, Laëtitia Chouquet, Emilie De Luca, Valérie Oules (Hôpital Saint Joseph, Marseille, France), Rodolphe Anty, Eve Gelsi, Régine Truchi (CHU de Nice, Nice, France), Elena Luckina, Nadia Messaoudi, Joseph Moussali (Hôpital de la Pitié Salpêtrière, Paris, France), Barbara De Dieuleveult, Damien Labarriere, Pascal Poter, Si Nafa Si Ahmed (CHR La Source, Orléans, France), Véronique Grando-Lemaire, Pierre Nahon, Valérie Bourcier Séverine Brulé, Thomas Stalhberger (Hôpital Jean Verdier, Bondy, France), Caroline Jezequel, Audrey Brener, Anne Laligant, Aline Rabot, Isabelle Renard (CHU Rennes, Rennes, France), Thomas F Baumert, Michel Doffoel, Catherine Mutter, Pauline Simo-Noumbissie, Esma Razi (Hôpitaux Universitaires de Strasbourg, Strasbourg, France), Hélène Barraud, Mouni Bensenane, Abdelbasset Nani, Sarah Hassani-Nani, Marie-Albertine Bernard (CHU de Nancy, Nancy, France), Georges-Philippe Pageaux, Michael Bismuth, Ludovic Caillo, Stéphanie Faure, Marie Pierre Ripault (Hôpital Saint Eloi, Montpellier, France), Christophe Bureau, Jean Marie Peron, Marie Angèle Robic, Léa Tarallo (CHU Purpan, Toulouse, France), Marine Faure, Bruno Froissart, Marie-Noelle Hilleret, Jean-Pierre Zarski (CHU de Grenoble, Grenoble, France), Odile Gorla, Victorien Gard, Hélène Montialoux (CHU Charles Nicolle, Rouen, France), Muriel François, Christian Ouedraogo, Christelle Pauleau, Anne Varault (Hôpital Henri Mondor, Créteil, France), Tony Andreani, Bénédicte Angoulevant, Azeline Chevance, Lawrence Serfaty, (Hôpital Saint-Antoine, Paris, France), Teresa Antonini, Audrey Coilly, Jean-Charles Duclos Vallée, Mariagrazia Tateo (Hôpital Paul Brousse, Villejuif, France), Corinne Bonny, Chanteranne Brigitte, Géraldine Lamblin, Léon Muti (Hôpital Estaing, Clermont-Ferrand, France), Abdenour Babouri, Virginie Filipe (Centre Hospitalier Régional, Metz, France), Camille Barrault, Laurent Costes, Hervé Hagège, Soraya Merbah (Centre Hospitalier Intercommunal, Créteil, France), Paul Carrier, Maryline Debette-Gratien, Jérémie Jacques (CHU Limoges, Limoges, France), Guillaume Lassailly, Florent Artu, Valérie Canva, Sébastien Dharancy, Alexandre Louvet (CHRU Claude Huriez, Lille, France), Marianne Latournerie, Marc Bardou, Thomas Mouillot (Dijon University Hospital, Dijon, France), Yannick Bacq, Didier Barbereau, Charlotte Nicolas (CHU Trousseau, 37044 Tours, France), Caroline Chevalier, Isabelle Archambeaud, Sarah Habes (CHU de Nantes, Nantes, France), Nisserine Ben Amara, Danièle Botta-Fridlund, (CHU Timone, Marseille, France), Eric Saillard, Marie-Josée Lafrance, (CHU de Pointe-à-Pitre, Pointe-à-Pitre, Guadeloupe). *Scientific committee—voting members:* Marc Bourlière (Hôpital St Joseph, Marseille), Patrice Cacoub (Hôpital Pitié Salpêtrière, Paris, France), Fabrice Carrat (Scientific Coordinator, Hôpital Saint-Antoine, Paris, France), Patrizia Carrieri (INSERM U912, Marseille, France), Elisabeth Delarocque-Astagneau (Inserm UMR1181, Paris), Victor De Ledinghen (Hôpital Haut-Lévêque, Pessac, Bordeaux, France), Céline Dorival (UPMC & INSERM U1136, Paris,

France), Jean Dubuisson (Inserm U1019, Lille, France), H el ene Fontaine (H opital Cochin, Paris, France), Chantal Housset (Inserm UMR-S938 1 IFR65, Paris), Dominique Larrey (H opital Saint Eloi, Montpellier, France), Patrick Marcellin (H opital Beaujon, Clichy, France), Philippe Mathurin (CHRU Claude Huriez, Lille, France), Pierre Nahon (H opital Jean Verdier, Bondy, France), Georges-Philippe Pageaux (H opital Saint Eloi, Montpellier, France), Jean-Michel Pawlotsky (H opital Henri Mondor, Cr eteil, France), Ventzislava Petrov-Sanchez (ANRS, Paris, France), Stanislas Pol (Principal Investigator, H opital Cochin, Paris, France), Sophie Vaux (Agence Nationale de Sant e Publique, Saint Maurice, France), Linda Wittkop (ISPED-INSERM U897, Bordeaux, France), Yazdan Yazdanpanah (H opital Bichat Claude Bernard, Paris, France), Jean-Pierre Zarski (CHU de Grenoble, Grenoble, France), Fabien Zoulim (Hospices Civils de Lyon, Lyon, France), Jessica Zucman-Rossi (INSERM U674/1162, Paris). *Scientific committee—non-voting members*: Marianne L'hennaff (ARCAT-TRT-5-CHV, France), Mich ele Sizorn (SOS h epatites, France); one representative of INSERM-ANRS Pharmacovigilance team, Paris, France (Imane Amri, Alpha Diallo), M elanie Simony, Carole Cagnot (INSERM-ANRS, Paris, France), one member of INSERM Transfert, Paris, France (Alice Bousselet, Mireille Caralp, Jean-Marc Lacombe), and one representative of each pharmaceutical company (MSD, Janssen, Gilead, AbbVie, Bristol-Myers Squibb, Roche). *Sponsor*: Imane Amri, Alpha Diallo, Carole Cagnot, M elanie Simony (INSERM-ANRS, Paris, France); Ventzi Petrov-Sanchez (coordinator). *Methodology and Coordinating Centre*: Loubna Ayour, Jaouad Benhida, Fabrice Carrat (coordinator), Frederic Chau, C eline Dorival, Audrey Gilibert, Isabelle Goderel, Victorien Grard, Warda Hadi, Georges Haour, Godwin Mawuvi, L ea Mba Mintsas, Gr egory Pannetier, Fran ois Pinot, Muriel Sudres, Fran ois T eloul e (Sorbonne Universit e and INSERM U1136, Paris, France).

**Fig. S1.** 20-years survival without HCC according to LCR1-LCR2 cut-offs and SVR subsets.

**Fig. S1A.** Survival without HCC according to LCR1-LCR2 cut-offs, among the subset of patients with SVR

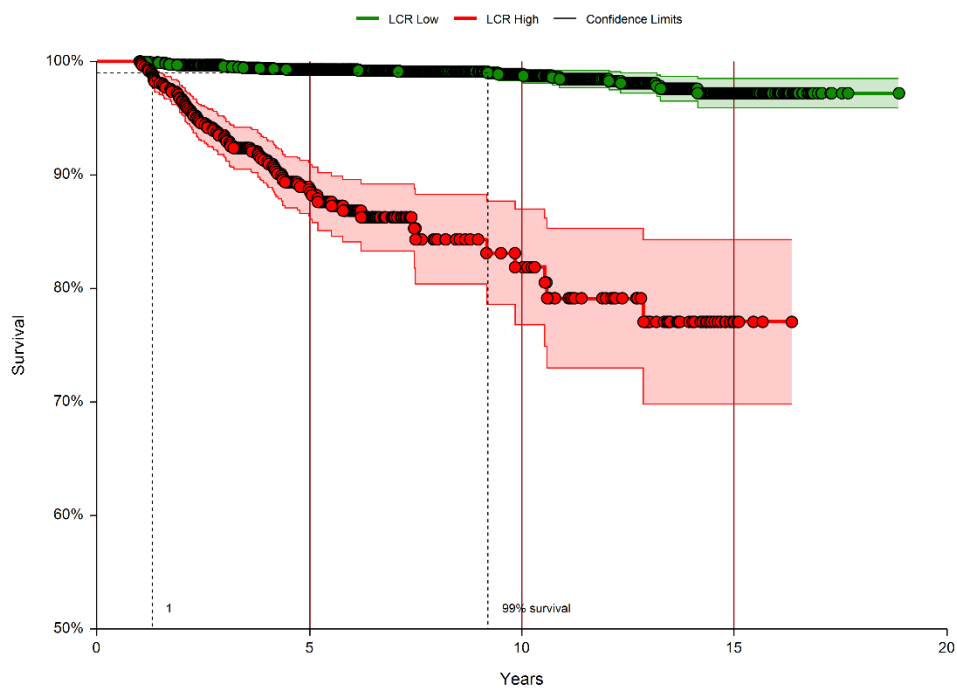

Number At Risk (Number of Events)

|                 |          |           |          |          |        |
|-----------------|----------|-----------|----------|----------|--------|
| algo = LCR Low  | 2568 (0) | 1642 (17) | 766 (21) | 142 (29) | 0 (29) |
| algo = LCR High | 837 (0)  | 365 (81)  | 66 (92)  | 5 (95)   | 0 (95) |

**Fig. S1B.** 20-year survival without HCC according to LCR1-LCR2 cut-offs, among the subset of patients without SVR

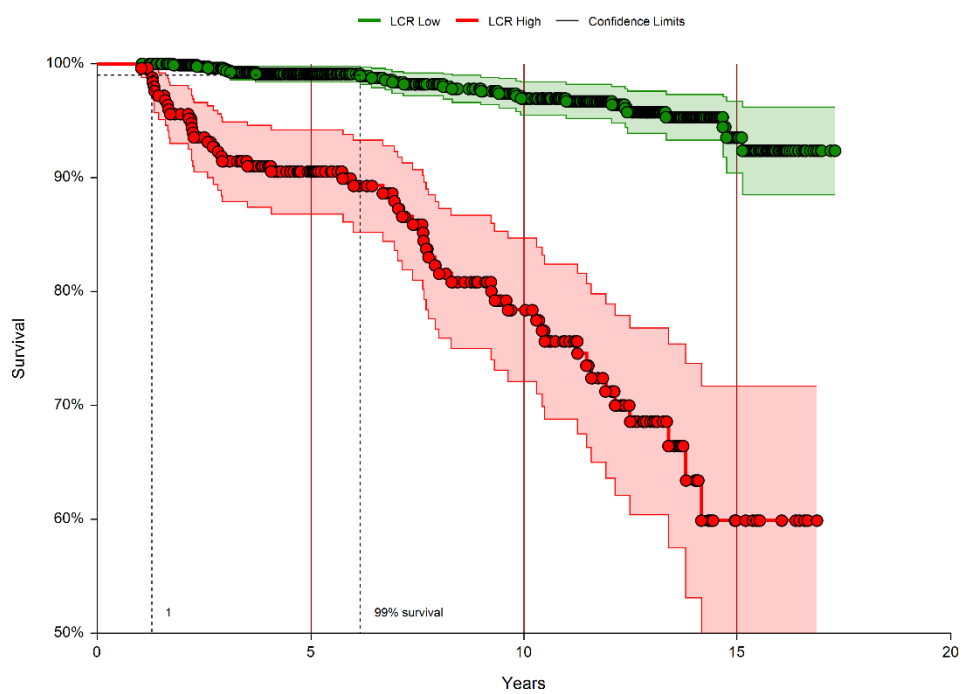

Number At Risk (Number of Events)

|                 | 0       | 5        | 10       | 15      | 20     |
|-----------------|---------|----------|----------|---------|--------|
| algo = LCR Low  | 851 (0) | 614 (7)  | 442 (18) | 86 (25) | 0 (26) |
| algo = LCR High | 251 (0) | 162 (23) | 89 (40)  | 10 (52) | 0 (52) |

**Fig. S2.** Original-Study updated. Survival without HCC according to LCR1-LCR2 cut-offs.

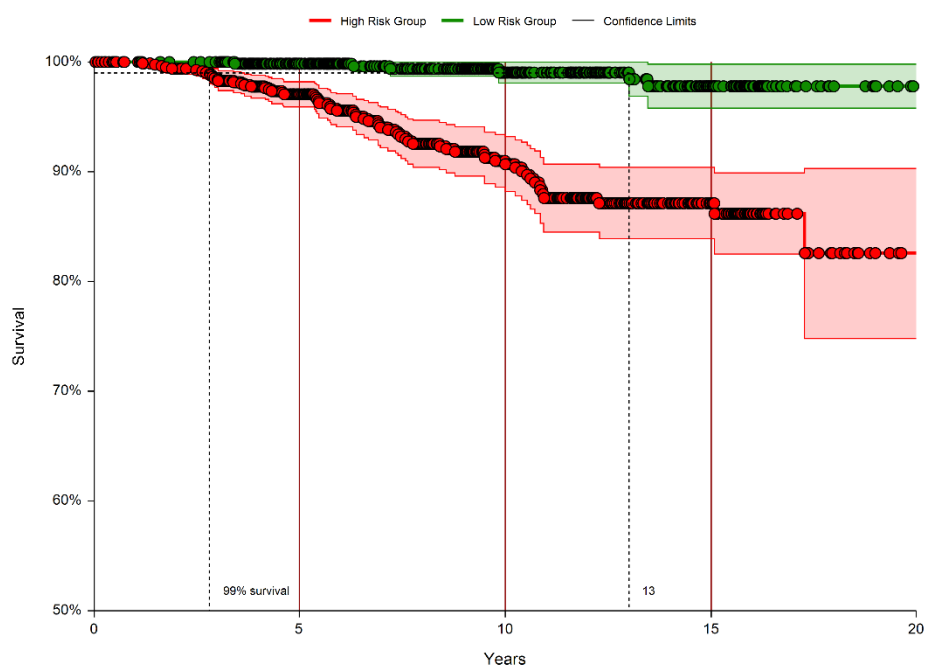

Number At Risk (Number of Events)

|                        | 0       | 5        | 10       | 15      | 20     |
|------------------------|---------|----------|----------|---------|--------|
| algo = High Risk Group | 847 (0) | 636 (23) | 301 (54) | 98 (64) | 6 (66) |
| algo = Low Risk Group  | 662 (0) | 535 (1)  | 284 (4)  | 105 (6) | 12 (6) |

**Fig. S3.** 20-year survival without HCC according to LCR1-LCR2 cut-offs in the pooled data base combining the present External validation and the Original-Study.

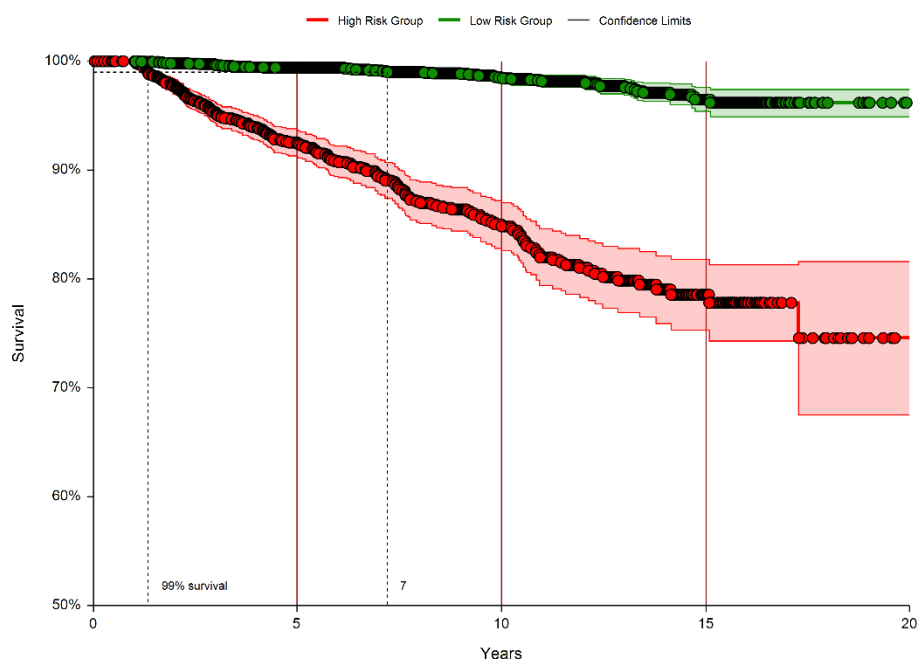

Number At Risk (Number of Events)

|                        |          |            |           |           |         |
|------------------------|----------|------------|-----------|-----------|---------|
| algo = High Risk Group | 1995 (0) | 1182 (136) | 462 (197) | 114 (222) | 6 (224) |
| algo = Low Risk Group  | 4417 (0) | 3021 (25)  | 1604 (43) | 348 (61)  | 12 (62) |

**Table S1.** Comparison of Hepather patients' characteristics between the included and the non-included patients in the external validation of LCR1-LCR2 algorithm. Missing data are detailed in Table 1. In case of non-normal distribution, the mean is given along with the median and IQR. Time to SVR is time between FibroTest assessment and SVR before HCC.

|                                                         | <b>Hepather cohort included</b> | <b>Hepather cohort not included</b> | <b>P value</b> |
|---------------------------------------------------------|---------------------------------|-------------------------------------|----------------|
| Number of patients                                      | 4,903                           | 5,418                               |                |
| HCC                                                     | 214 (4.4%)                      | 292 (5.4%)                          | 0.01           |
| Follow-up time (years)                                  | 5.8 [4.2-11.4]<br>mean 7.5      | 4.6 [3.0-5.9] mean<br>4.8           | <0.001         |
| Age at inclusion                                        | 55.6 [49.0-64.4]                | 56.3 [50.7-64.1]                    | <0.001         |
| Age at FibroTest time                                   | 52.6 [45.1-61.1]                | 49.9 [41.5-58.1]                    | 0.277          |
| Men                                                     | 2,412 (49.2%)                   | 3,235 (59.7%)                       | <0.001         |
| Body mass Index (kg/m <sup>2</sup> )                    | 24.4 [21.9-27.4]                | 24.8 [22.2-27.8]                    | <0.001         |
| Geographical origin                                     |                                 |                                     | 0.11           |
| France or Eastern Europe                                | 3,488 (71.7%)                   | 3,748 (70.3%)                       |                |
| Asia                                                    | 108 (2.2%)                      | 117 (2.2%)                          |                |
| North Africa                                            | 427 (8.8%)                      | 543 (10.2%)                         |                |
| Other (mostly Sub-Saharan)                              | 841 (17.3%)                     | 925 (17.3%)                         |                |
| missing                                                 | 39                              | 85                                  |                |
| Past excessive alcohol use                              | 1,225 (25.0%)                   | 1,700 (31.4%)                       | <0.001         |
| HCV treatment naive at inclusion                        | 2,388 (48.8%)                   | 2,529 (46.8%)                       |                |
| at FibroTest time                                       | 2,916 (59.5%)                   | -                                   |                |
| HCV genotype                                            |                                 |                                     | 0.001          |
| 1                                                       | 3,300 (67.6%)                   | 3,441 (64.5%)                       |                |
| 2                                                       | 332 (6.8%)                      | 353 (6.6%)                          |                |
| 3                                                       | 547 (11.2%)                     | 719 (13.5%)                         |                |
| 4                                                       | 583 (11.9%)                     | 716 (13.4%)                         |                |
| 5,6,7                                                   | 117 (2.4%)                      | 106 (2.0%)                          |                |
| missing                                                 | 24                              | 83                                  |                |
| Fibrosis stage (using Hepather algorithm*) at inclusion |                                 |                                     |                |
| F0                                                      | 1,271 (27.1%)                   | 953 (19.4%)                         |                |
| F1                                                      | 1,055 (22.5%)                   | 818 (16.7%)                         |                |
| F2                                                      | 540 (11.5%)                     | 445 (9.1%)                          |                |
| F3                                                      | 801 (17.1%)                     | 802 (16.4%)                         |                |
| F4                                                      | 1,026 (21.9%)                   | 1,884 (38.4%)                       |                |
| missing                                                 | 210                             | 516                                 |                |
| ALT (UI/l) at inclusion                                 | 55 [36-90] mean<br>74.6         | 62 [39-104] mean<br>83.8            |                |
| Type-2 Diabetes                                         | 506 (10.3%)                     | 747 (13.8%)                         | <0.001         |
| Arterial hypertension                                   | 1,313 (26.8%)                   | 1,614 (29.8%)                       | <0.001         |



|                   |                            |                             |        |
|-------------------|----------------------------|-----------------------------|--------|
| AFP (ng/ml)       | 4.4 [3.0-7.6] mean<br>14.2 | 5.4 [3.2-10.4] mean<br>12.2 | 0.662  |
| missing           | 1,182                      | 2,011                       |        |
| AFP class (ng/ml) |                            |                             | <0.001 |
| < 6               | 2,396 (64.4%)              | 1,825 (53.6%)               |        |
| 6 to <10          | 674 (18.1%)                | 671 (19.7%)                 |        |
| 10 to <20         | 417 (11.2%)                | 523 (15.4%)                 |        |
| 20 to <120        | 207 (5.6%)                 | 345 (10.1%)                 |        |
| >120              | 27 (0.7%)                  | 43 (1.3%)                   |        |
| missing           | 728                        | 2,011                       |        |

**Table S2.** Characteristics of incident HCCs.**Table S2A** Characteristics of incident HCCs according to LCR1-LCR2 cut offs.

| Characteristics                                                     | Low LCR1-LCR2      | High LCR1-LCR2   | P-value |
|---------------------------------------------------------------------|--------------------|------------------|---------|
|                                                                     | N=56               | N= 158           |         |
| Time between last normal evaluation and first abnormal (months)     | 16 6.00 [5.1-16.6] | 6.50 [2.6-22.8]  | 0.20    |
| <i>missing</i>                                                      | 24                 | 40               |         |
| Time between first abnormal evaluation and diagnosis (months) (std) | 1.2 [0-2.70]       | 0.6 [0-3.0]      | 0.78    |
| <i>missing</i>                                                      | 15                 | 11               |         |
| Time between last normal evaluation and diagnosis (months) (std)    | 9.3 [6.1-18.9]     | 9.9 [5.3-16.5]   | 0.87    |
| <i>missing</i>                                                      | 23                 | 33               | 0.88    |
| Macroscopic pattern                                                 |                    |                  |         |
| Infiltrative                                                        | 4 (8.3 %)          | 18 (11.4%)       |         |
| Nodular                                                             | 44 (91.7 %)        | 140 (88.6 %)     | 0.23    |
| <i>missing</i>                                                      | 8                  | 0                |         |
| In nodular patterns:                                                |                    |                  |         |
| Number of tumors at diagnosis                                       | 1.1 (1.1)          | 1.54 (1.2)       | 0.84    |
| <i>Missing</i>                                                      | 13                 | 20               |         |
| Largest nodule size (mm)                                            | 25.0 [20.0-30.0]   | 20.0 [15.0-30.0] | 0.44    |
| <i>Missing</i>                                                      | 9                  | 2                |         |
| Total nodule size                                                   | 25.5 [20.0-38.0]   | 22.3 [15.0-40.0] |         |
| <i>Missing</i>                                                      | 11                 | 4                |         |
| Alpha foetoproteine                                                 |                    |                  |         |
| At entry                                                            | 1.54 [1.02-2.00]   | 2.46 [1.87-3.14] | < 0.001 |
| <6                                                                  | 34 (60.9 %)        | 33 (20.9 %)      | < 0.001 |
| 6-10                                                                | 14 (23.9 %)        | 32 (20.3 %)      |         |
| 10-20                                                               | 6 (10.9 %)         | 47 (30.0 %)      |         |
| 20-120                                                              | 2 (4.3 %)          | 38 (23.8 %)      |         |
| ≥120                                                                | 0 (0 %)            | 8 (5.0 %)        |         |
| At diagnosis                                                        | 2.13 [1.44-5.00]   | 2.77 [1.74-4.53] | 0.26    |
| <6                                                                  | 20 (44.4 %)        | 41 (26.3 %)      | 0.04    |
| 6-10                                                                | 5 (11.1 %)         | 18 (11.5 %)      |         |
| 10-20                                                               | 4 (8.9 %)          | 25 (16.0 %)      |         |
| 20-120                                                              | 4 (8.9 %)          | 41 (26.3 %)      |         |
| ≥120                                                                | 12 (26.7 %)        | 31 (19.9 %)      |         |
| <i>missing</i>                                                      | 11                 | 2                |         |
| Liver biopsy at diagnosis                                           | 22 (45.8 %)        | 56 (35.9 %)      | 0.21    |
| <i>Missing</i>                                                      | 8                  | 2                |         |
| Grade WHO                                                           |                    |                  |         |
| Well differentiated                                                 | 10                 | 20               |         |
| Moderately differentiated                                           | 6                  | 20               |         |
| Poorly differentiated/undifferentiated                              | 2                  | 4                |         |
| Cholangiocarcinoma                                                  | 1                  | 0                |         |
| Not interpretable                                                   | 1                  | 2                |         |
| Others                                                              | 0                  | 0                |         |
| Missing                                                             | 2                  | 10               |         |

**Table S2B.** Comparison of patients' characteristics between the low-risk population with HCC vs. the low-risk population without HCC and vs. the high-risk population without HCC.

|                                         | Low LCR1-<br>LCR2 5yr<br>HCC+                 | Low LCR1-LCR2<br>HCC-     | High LCR1-<br>LCR2 HCC- | P value |
|-----------------------------------------|-----------------------------------------------|---------------------------|-------------------------|---------|
| Number of patients                      | 24                                            | 3,731                     | 1,035                   |         |
| F0/F1/F2/F3/F4                          | 0/ <b>2</b> / <b>6</b> / <b>5</b> / <b>11</b> | 1605/1057/395/52<br>0/104 | 0/39/70/300/6<br>26     | <0.0001 |
| Follow-up time<br>(years)               | 3.0 [1.7-3.3]                                 | 5.0 [4.5-5.0]             | 5.0 [4.0-5.0]           | <0.0001 |
| Age at FibroTest time                   | 53.2 [48.3-58.7]                              | 49.9 [43.0-57.2]          | 63.1 [54.8-<br>71.0]    | <0.0001 |
| Men                                     | <b>17 (70.8 %)</b>                            | 1713 (45.9 %)             | 594 (57.4 %)            | <0.0001 |
| Body mass Index<br>(kg/m <sup>2</sup> ) | 24.7 [22.6-26.4]                              | 24.1 [21.6-27.1]          | 25.4 [22.8-<br>28.3]    | <0.0001 |
| Geographical origin                     |                                               |                           |                         | <0.0001 |
| France or Eastern<br>Europe             | 19 (79.2 %)                                   | 2694 (72.2 %)             | 693 (67.0 %)            |         |
| Asia                                    | 0 (0 %)                                       | 93 (2.5 %)                | 14 (1.4 %)              |         |
| North Africa                            | 3 (12.5 %)                                    | 299 (8.0 %)               | 114 (11.0 %)            |         |
| Other, mostly Sub-<br>Saharan           | 1 (4.2 %)                                     | 615 (16.5 %)              | 206 (19.9 %)            |         |
| missing                                 | 1                                             | 30                        | 8                       |         |
| Past excessive<br>alcohol use           | <b>8 (33.3 %)</b>                             | 886 (23.8 %)              | 285 (27.5 %)            | 0.0265  |
| HCV genotype                            |                                               |                           |                         |         |
| 1                                       | 8 (33.3 %)                                    | 2463 (66.3 %)             | 766 (74.4 %)            | <0.0001 |
| 2                                       | 0 (0 %)                                       | 278 (7.5 %)               | 46 (4.5 %)              |         |
| 3                                       | <b>12 (50.0 %)</b>                            | 423 (11.4 %)              | 82 (8.0 %)              |         |
| 4                                       | 4 (16.7 %)                                    | 454 (12.2 %)              | 115 (11.2 %)            |         |
| 5,6,7                                   | 0 (0 %)                                       | 95 (2.6 %)                | 21 (2.0 %)              |         |
| missing                                 |                                               |                           |                         |         |
| FibroTest stage                         |                                               |                           |                         | <0.0001 |
| F0                                      | 0 (0 %)                                       | 1605 (43.2 %)             | 0 (0 %)                 |         |
| F1                                      | <b>2 (8.3 %)</b>                              | 1057 (28.3 %)             | 39 (3.8 %)              |         |
| F2                                      | <b>6 (25.0 %)</b>                             | 395 (10.6 %)              | 70 (6.8 %)              |         |
| F3                                      | 5 (20.8 %)                                    | 520 (13.9 %)              | 300 (29.0 %)            |         |
| F4                                      | 11 (45.8 %)                                   | 154 (4.1 %)               | 626 (60.5 %)            |         |
| missing                                 |                                               |                           |                         |         |
| Type-2 Diabetes                         | <b>5 (20.8 %)</b>                             | 250 (6.7 %)               | 222 (21.5 %)            | <0.0001 |
| Arterial hypertension                   | 2 (8.3 %)                                     | 818 (21.9 %)              | 442 (42.7 %)            | <0.0001 |
| AFP (ng/ml)                             | <b>4.8 [2.7-7.6]</b>                          | 3.2 [2.1-5.0]             | 8.2 [5.0-14.7]          | <0.0001 |
| AFP by classes                          |                                               |                           |                         |         |
| < 6                                     | 14 (58.3 %)                                   | 2457 (81.8 %)             | 344 (33.2 %)            | <0.0001 |
| 6 to < 10                               | <b>7 (29.2 %)</b>                             | 356 (11.9 %)              | 269 (26.0 %)            |         |
| 10 to <20                               | <b>3 (12.5 %)</b>                             | 149 (5.0 %)               | 236 (22.8 %)            |         |

|            |         |            |              |  |
|------------|---------|------------|--------------|--|
| 20 to <120 | 0 (0 %) | 40 (1.3 %) | 169 (16.3 %) |  |
| >120       | 0 (0 %) | 1 (0 %)    | 17 (1.6 %)   |  |
| missing    | 0       | 708        | 0            |  |

**Table S3.** Comparison of patients' characteristics between the low and high -risk populations according to LCR1-LCR2 algorithm (n=4,903)

|                                      | <b>Low LCR1-LCR2</b>       | <b>High LCR1-LCR2</b>     | <b>P value</b> |
|--------------------------------------|----------------------------|---------------------------|----------------|
| Number of patients                   | 3,755 (76.6%)              | 1,148 (23.4%)             |                |
| HCC number by F0/F1/F2/F3/F4)        | False negative             | True positive             |                |
| within 5 years                       | 24 (0/2/6/5/11)            | 113 (0/0/1/11/101)        | <0.0001        |
| within 10 years                      | 39 (4/5/7/10/13)           | 143 (0/0/4/20/119)        | <0.0001        |
| End of follow-up                     | 56 (5/10/8/18/15)          | 158 (0/1/6/24/127)        | <0.0001        |
| Follow-up time (years)               | 6.4 [4.5-12.1]<br>mean 8.0 | 4.9 [3.6-6.4] mean<br>5.7 | <0.001         |
| Age at FibroTest time                | 49.9 [43.1-57.2]           | 62.8 [54.8-70.7]          | <0.001         |
| Men                                  | 1,730 (46.1%)              | 682 (59.4%)               | <0.001         |
| Body mass Index (kg/m <sup>2</sup> ) | 24.1 [21.6-27.1]           | 25.4 [22.9-28.2]          | <0.001         |
| Geographical origin                  |                            |                           | 0.003          |
| France or Eastern Europe             | 2,713 (72.9%)              | 775 (68.0%)               |                |
| Asia                                 | 93 (2.5%)                  | 15 (1.3%)                 |                |
| North Africa                         | 302 (8.1%)                 | 125 (11%)                 |                |
| Other (mostly Sub-Saharan)           | 616 (16.5%)                | 225 (19.7%)               |                |
| missing                              | 31                         | 8                         |                |
| Past excessive alcohol use           | 894 (23.8%)                | 331 (28.8%)               |                |
| HCV genotype                         |                            |                           | <0.001         |
| 1                                    | 2,471 (66.1%)              | 829 (72.6%)               |                |
| 2                                    | 278 (7.4%)                 | 54 (4.7%)                 |                |
| 3                                    | 435 (11.6%)                | 112 (9.8%)                |                |
| 4                                    | 458 (12.3%)                | 125 (10.9%)               |                |
| 5,6,7                                | 95 (2.5%)                  | 22 (1.9%)                 |                |
| missing                              | 18                         | 6                         |                |
| FibroTest stage                      |                            |                           | <0.001         |
| F0                                   | 1,605 (42.7%)              | 0 (0%)                    |                |
| F1                                   | 1,059 (28.2%)              | 39 (3.4%)                 |                |
| F2                                   | 401 (10.7%)                | 71 (6.2%)                 |                |
| F3                                   | 525 (14.0%)                | 311 (27.1%)               |                |
| F4                                   | 165 (4.4%)                 | 727 (63.3%)               |                |
| missing                              | 0                          | 0                         |                |
| Type-2 Diabetes                      | 255 (6.8%)                 | 251 (21.9%)               | <0.001         |
| Arterial hypertension                | 820 (21.8%)                | 493 (42.9%)               | <0.001         |
| AFP (ng/ml)                          | 3.2 [2.1-5.0] mean<br>4.5  | 8.4 [5.0-15.2] mean<br>35 | 0.035          |
| AFP by classes                       |                            |                           | <0.001         |
| < 6                                  | 2471 (81.7 %)              | 370 (32.2 %)              |                |
| 6 to < 10                            | 364 (12.0 %)               | 290 (25.3 %)              |                |
| 10 to <20                            | 152 (5.0 %)                | 268 (23.3 %)              |                |
| 20 to <120                           | 39 (1.3 %)                 | 197 (17.2 %)              |                |
| >120                                 | 1 (0 %)                    | 23 (2.0 %)                |                |
| missing                              | 728                        | 0                         |                |

**Table S4.** Fifth post-hoc analysis. **Characteristics of patients with or without SVR.**  
**Table S4A.** Subset of patients with SVR

|                                               | <b>Hepather cohort patients included with SVR during follow-up</b> | <b>Missing data</b> |
|-----------------------------------------------|--------------------------------------------------------------------|---------------------|
| Number of patients                            | 3 405                                                              | 0                   |
| HCC                                           | 124 (3.6 %)                                                        | 0                   |
| LCR1-LCR2 algorithm                           |                                                                    | 0                   |
| Low risk                                      | 2568 (75.4%)                                                       |                     |
| High risk                                     | 837 (24.6%)                                                        |                     |
| Follow-up time (years), median [IQR]          | 5.4 [4.2-9.8]                                                      | 0                   |
| Age at inclusion                              | 55.7 [49.2-64.3]                                                   | 0                   |
| Age at FibroTest time                         | 53.3 [46.1-61.7]                                                   | 0                   |
| Men                                           | 1650 (48.5%)                                                       | 0                   |
| Body mass Index (kg/m <sup>2</sup> )          | 24.4 [21.9-27.3]                                                   | 10                  |
| Smoker                                        |                                                                    | 4                   |
| At inclusion                                  | 1145 (36.7%)                                                       |                     |
| In the past                                   | 2062 (60.6%)                                                       |                     |
| Geographical origin                           |                                                                    | 25                  |
| France or Eastern Europe                      | 2616 (77.4 %)                                                      |                     |
| Asia                                          | 83 (2.5%)                                                          |                     |
| North Africa                                  | 346 (10.2 %)                                                       |                     |
| Other (mostly Sub-Saharan)                    | 335 (9.9 %)                                                        |                     |
| Past excessive alcohol use                    | 831 (24.4 %)                                                       | 0                   |
| Time since HCV infection                      | 10.7 [3.7-17.3]                                                    | 88                  |
| HCV contamination cause                       |                                                                    | 1263                |
| Drug usage                                    | 527 (24.6%)                                                        |                     |
| Transfusion                                   | 717 (33.5%)                                                        |                     |
| Other or unknown                              | 898 (41.9%)                                                        |                     |
| HCV genotype                                  |                                                                    | 14                  |
| 1                                             | 2337 (68.9 %)                                                      |                     |
| 2                                             | 204 (6.0 %)                                                        |                     |
| 3                                             | 369 (10.9 %)                                                       |                     |
| 4                                             | 401 (11.8%)                                                        |                     |
| 5,6,7                                         | 80 (2.4%)                                                          |                     |
| Fibrosis at inclusion using Hepather criteria |                                                                    | 129                 |
| F0                                            | 896 (27.3%)                                                        |                     |
| F1                                            | 712 (21.7%)                                                        |                     |
| F2                                            | 391 (11.9%)                                                        |                     |
| F3                                            | 585 (17.9%)                                                        |                     |
| F4                                            | 692 (21.1%)                                                        |                     |
| Fibrosis at first FibroTest assessment        |                                                                    | 0                   |
| F0 (<=0.21)                                   | 1109 (32.6%)                                                       |                     |
| F1 (>0.21)                                    | 728 (21.4%)                                                        |                     |
| F2 (0.48)                                     | 331 (9.7%)                                                         |                     |

|                         |               |     |
|-------------------------|---------------|-----|
| F3 (0.58)               | 591 (17.4%)   |     |
| F4 (0.74)               | 646 (19.0%)   |     |
| ALT (IU/l) at inclusion | 55 [37-91]    | 36  |
| Type-2 Diabetes         | 353 (10.4%)   | 0   |
| Arterial hypertension   | 919 (27.0%)   | 0   |
| AFP (ng/ml)             | 4.0 [2.5-7.0] | 481 |
| AFP class (ng/ml)       |               | 481 |
| < 6                     | 2005 (68.6%)  |     |
| 6 to <10                | 476 (16.3%)   |     |
| 10 to <20               | 273 (9.3%)    |     |
| 20 to <120              | 157 (5.4%)    |     |
| >120                    | 13 (0.4%)     |     |

**Table S4B. Subset of patients without SVR**

|                                               | <b>Hepather cohort patients included without SVR during follow up</b> | <b>Missing data</b> |
|-----------------------------------------------|-----------------------------------------------------------------------|---------------------|
| Number of patients                            | 1102                                                                  | 0                   |
| HCC                                           | 78 (7.1 %)                                                            | 0                   |
| LCR1-LCR2 algorithm                           |                                                                       | 0                   |
| Low risk                                      | 851 (77.2%)                                                           |                     |
| High risk                                     | 251 (22.8%)                                                           |                     |
| Follow-up time (years), median [IQR]          | 9.6 [4.5-13.1]                                                        | 0                   |
| Age at inclusion                              | 55.9 [49.5-64.6]                                                      | 0                   |
| Age at FibroTest time                         | 51.1 [43.8-59.3]                                                      | 0                   |
| Men                                           | 595 (54.0%)                                                           | 0                   |
| Body mass Index (kg/m <sup>2</sup> )          | 24.6 [21.9-27.6]                                                      | 4                   |
| Smoker                                        |                                                                       | 0                   |
| At inclusion                                  | 384 (34.9%)                                                           |                     |
| In the past                                   | 688 (62.6%)                                                           |                     |
| Geographical origin                           |                                                                       | 10                  |
| France or Eastern Europe                      | 808 (74.0%)                                                           |                     |
| Asia                                          | 28 (2.6%)                                                             |                     |
| North Africa                                  | 128 (11.7%)                                                           |                     |
| Other (mostly Sub-Saharan)                    | 128 (11.7%)                                                           |                     |
| Past excessive alcohol use                    | 299 (27.1 %)                                                          | 0                   |
| Time since HCV infection                      | 8.5 [2.8-14.8]                                                        | 21                  |
| HCV contamination cause                       |                                                                       | 218                 |
| Drug usage                                    | 236 (26.7%)                                                           |                     |
| Transfusion                                   | 290 (32.8%)                                                           |                     |
| Other or unknown                              | 358 (40.5%)                                                           |                     |
| HCV genotype                                  |                                                                       | 6                   |
| 1                                             | 727 (66.3%)                                                           |                     |
| 2                                             | 90 (8.2%)                                                             |                     |
| 3                                             | 118 (10.8%)                                                           |                     |
| 4                                             | 137 (12.5%)                                                           |                     |
| 5,6,7                                         | 24 (2.2%)                                                             |                     |
| Fibrosis at inclusion using Hepather criteria |                                                                       | 58                  |
| F0                                            | 238 (22.8%)                                                           |                     |
| F1                                            | 223 (21.4%)                                                           |                     |
| F2                                            | 117 (11.2%)                                                           |                     |
| F3                                            | 185 (17.7%)                                                           |                     |
| F4                                            | 281 (26.9%)                                                           |                     |
| Fibrosis at first FibroTest assessment        |                                                                       | 0                   |
| F0 (<=0.21)                                   | 306 (27.8%)                                                           |                     |
| F1 (>0.21)                                    | 273 (24.8%)                                                           |                     |
| F2 (0.48)                                     | 117 (10.6%)                                                           |                     |
| F3 (0.58)                                     | 203 (18.4%)                                                           |                     |



|                         |                  |     |
|-------------------------|------------------|-----|
| F4 (0.74)               | 203 (18.4%)      |     |
| ALT (IU/l) at inclusion | 56.0 [36.0-93.0] | 15  |
| Type-2 Diabetes         | 130 (11.8%)      | 0   |
| Arterial hypertension   | 285 (25.9%)      | 1   |
| AFP (ng/ml)             | 4.3 [2.7-8.2]    | 145 |
| AFP class (ng/ml)       |                  | 145 |
| < 6                     | 608 (63.5%)      |     |
| 6 to <10                | 146 (15.3%)      |     |
| 10 to <20               | 125 (13.1%)      |     |
| 20 to <120              | 69 (7.2%)        |     |
| >120                    | 9 (0.9%)         |     |

**Table S4C.** Performance of LCR1-LCR2 algorithm according to SVR status during using HCC Standardized Ratio Incidence (SIR)

| <b>Surveillance option</b>                     |                   |            |                                     |
|------------------------------------------------|-------------------|------------|-------------------------------------|
| <b>Only patients with SVR</b>                  | <b>Case<br/>s</b> | <b>HCC</b> | <b>Standardized Ratio Incidence</b> |
| <i>5-years follow-up, 1-year HCC exclusion</i> | n                 | n          | LCR1-LCR2 Low risk/ High risk       |
| Primary outcome                                | 3405              | 98         | 10.0 [5.8-16.0]/ 54.4[43.2-67.6]    |
| Secondary outcome F3F4                         | 3405              | 98         | 10.0 [5.82-16.01]/ 54.4[43.2-67.6]  |
| <b>Only patients without SVR</b>               | <b>Case<br/>s</b> | <b>HCC</b> | <b>Standardized Ratio Incidence</b> |
| <i>5-years follow-up, 1-year HCC exclusion</i> | n                 | n          | LCR1-LCR2 Low risk/ High risk       |
| Primary outcome                                | 1102              | 30         | 12.7 [5.1-26.2]/ 57.5[36.4-86.3]    |
| Secondary outcome F3F4                         | 1102              | 30         | 12.7 [5.1-26.2]/ 57.5[36.4-86.3]    |

**Table S4D.** LCR1-LCR2 predictive values, sensitivity and specificity according to SVR status

| Surveillance option         | LCR1-LCR2 performances    |                           |                  |                  |
|-----------------------------|---------------------------|---------------------------|------------------|------------------|
|                             | Negative Predictive Value | Positive Predictive Value | Sensitivity      | Specificity      |
|                             | % (95% CI)                | %                         | %                | %                |
| <b>Patients with SVR</b>    |                           |                           |                  |                  |
| Primary outcome             | 96.7 (93.5-99.9)          | 15.6 (9.1-22.2)           | 62.5 (53.8-71.2) | 75.7 (68.0-83.4) |
| Secondary outcome F3F4      | 96.7 (93.5-99.9)          | 15.6 (9.1-22.2)           | 62.5 (53.8-71.2) | 75.7 (68.0-83.4) |
| <b>Patients without SVR</b> |                           |                           |                  |                  |
| Primary outcome             | 99.2 (98.7-99.7)          | 9.2 (7.5-10.9)            | 76.7 (74.2-79.2) | 78.7 (76.3-81.1) |
| Secondary outcome F3F4      | 99.2 (98.7-99.7)          | 9.2 (7.5-10.9)            | 76.7 (74.2-79.2) | 78.7 (76.3-81.1) |

**Table S4E. Time-dependent univariate and multivariate analyses in patients with SVR.**

|                                         | Time-dependent hazard ratio (HR) in SVR patients |                   |                  |              |                   |                  |
|-----------------------------------------|--------------------------------------------------|-------------------|------------------|--------------|-------------------|------------------|
|                                         | Univariate                                       |                   |                  | Multivariate |                   |                  |
|                                         | HR                                               | 95%CI             | P-value          | HR           | 95%CI             | P-value          |
| LCR1-LCR2 algorithm                     | <b>16.32</b>                                     | <b>9.67-27.53</b> | <b>&lt;0.001</b> | <b>12.34</b> | <b>6.74-22.59</b> | <b>&lt;0.001</b> |
| Gender (men vs women)                   | 4.10                                             | 2.53-6.64         | <0.001           | 2.14         | 1.23-3.71         | 0.0070           |
| Age (years) at FT time                  | 1.04                                             | 1.03-1.06         | <0.001           |              |                   |                  |
| <=50 (reference)                        |                                                  |                   |                  |              |                   |                  |
| <=50-60                                 | 3.84                                             | 2.11-7.02         | <0.001           | 1.29         | 0.68-2.47         | 0.4358           |
| >60                                     | 3.95                                             | 2.15-7.26         | <0.001           | 1.05         | 0.52-2.14         | 0.8928           |
| Geographical origin (European vs other) | 1.44                                             | 0.84-2.46         | 0.1811           | 1.54         | 0.89-2.66         | 0.1223           |
| Past excessive alcohol use (yes vs no)  | 2.22                                             | 1.48-2.32         | 0.0001           | 1.29         | 0.83-2.01         | 0.2634           |
| Ever smoked (yes vs no)                 | 1.57                                             | 1.02-2.42         | 0.0423           | 0.89         | 0.53-1.49         | 0.6496           |
| Treatment-naive vs Treated              | 0.28                                             | 0.18-0.43         | <0.001           | 0.52         | 0.33-0.81         | 0.0041           |
| HCV genotype 3 (other reference)        | 3.79                                             | 2.46-5.82         | <0.001           | 4.27         | 2.70-6.75         | <0.001           |
| Diabetes (yes vs no)                    | 3.27                                             | 2.09-5.12         | <0.001           | 1.42         | 0.89-2.27         | 0.1441           |
| Arterial hypertension (yes vs no)       | 1.83                                             | 1.22-2.74         | 0.0034           | 1.37         | 0.88-2.13         | 0.1624           |

**Table S5.** Post-hoc analysis #6. Comparison of the HCC standardized risk ratio (SIR) in the low LCR1-LCR2 subset vs. the risk observed in the general population.

**Table S5.A** Standardized Incidence Ratio (SIR) by age and gender

| LCR1-LCR2 | Total    |          | IC95 SIR |       | P value<br>SIR=1 as<br>reference |        |
|-----------|----------|----------|----------|-------|----------------------------------|--------|
|           | Observed | Expected | SIR      | low   |                                  | up     |
| Low       | 24       | 2.45     | 9.80     | 6.27  | 14.58                            | <0.001 |
| High      | 113      | 1.99     | 56.78    | 46.80 | 68.27                            | <0.001 |

**Table S5.B** Incidence of HCC in France adjusted on age and gender.

Defossez G, Le Guyader-Peyrou S, Uhry Z, et al. Estimations nationales de l'incidence et de la mortalité par cancer en France métropolitaine entre 1990 et 2018. Volume 1. Saint-Maurice (Fra): Santé publique France, 2019. <http://www.santepubliquefrance.fr/>

| Standardized incidence of HCC in France |        |        |
|-----------------------------------------|--------|--------|
| Age<br>[years classes]                  | Gender |        |
|                                         | Male   | Female |
| [0;14]                                  | 0.3    | 0.2    |
| [15;19]                                 | 0.1    | 0.1    |
| [20;24]                                 | 0.2    | 0.1    |
| [25;29]                                 | 0.3    | 0.2    |
| [30;34]                                 | 0.5    | 0.4    |
| [35;39]                                 | 0.9    | 0.6    |
| [40;44]                                 | 2.3    | 1.2    |
| [45;49]                                 | 7.0    | 2.4    |
| [50;54]                                 | 19.2   | 4.5    |
| [55;59]                                 | 38.4   | 7.4    |
| [60;64]                                 | 61.4   | 11.2   |
| [65;69]                                 | 83.9   | 16.2   |
| [70;74]                                 | 101.5  | 21.6   |
| [75;79]                                 | 114.1  | 27.1   |
| [80;84]                                 | 117.3  | 31.9   |
| [85;89]                                 | 109.4  | 34.8   |
| [90;94]                                 | 89.4   | 33.1   |
| [95;+]                                  | 64.9   | 27.4   |

**Table S6.** Original Study. Updated characteristics for participants of the chronic hepatitis C subset, included in the first study of LCR1-LCR2 algorithm

|                                                 | <b>Original Study</b>   | <b>Missing data</b> |
|-------------------------------------------------|-------------------------|---------------------|
| Number of patients                              | 1,509                   | 0                   |
| HCC                                             | 72 (4.8%)               | 0                   |
| LCR1-LCR2 algorithm                             |                         | 0                   |
| Low risk                                        | 662 (43.9%)             |                     |
| High risk                                       | 847 (56.1%)             |                     |
| Follow-up time, median (years)                  | 6.8 [3.0-10.2] mean 7.0 | 0                   |
| Age at inclusion (IQR)                          | 47.0 [40.3-57.7]        | 0                   |
| Age at FibroTest time                           | 47.0 [40.3-57.7]        | 0                   |
| Men                                             | 974 (64.6%)             | 0                   |
| Body mass Index (kg/m <sup>2</sup> )            | 23.5 [21.1-25.6]        | 1070                |
| Smoker at inclusion                             | 250 (16.6%)             |                     |
| Geographical origin                             |                         | 0                   |
| France or Eastern Europe                        | 1023 (67.8%)            |                     |
| Asia                                            | 84 (5.6%)               |                     |
| North Africa                                    | 211 (14.0%)             |                     |
| Other (mostly Sub-Saharan)                      | 191 (12.6%)             |                     |
| Excessive alcohol use at inclusion              | 142 (9.4 %)             | 0                   |
| Time since HCV infection                        | 10.1 [3.3-16.6]         | 88                  |
| HCV genotype                                    |                         | 373                 |
| 1                                               | 623 (54.8%)             |                     |
| 2                                               | 85 (7.5%)               |                     |
| 3                                               | 181 (15.9%)             |                     |
| 4,5,6,7                                         | 247 (21.8%)             |                     |
| Fibrosis at inclusion (using FibroTest cutoffs) |                         | 0                   |
| F0 (<=0.21)                                     | 482 (31.9%)             |                     |
| F1 (>0.21)                                      | 301 (20.0%)             |                     |
| F2 (>0.48)                                      | 148 (9.8%)              |                     |
| F3 (>0.58)                                      | 230 (15.2%)             |                     |
| F4 (>0.74)                                      | 348 (23.1%)             |                     |
| Activity grade (ActiTest cutoff)                |                         | 1                   |
| A0 (<=0.29)                                     | 556 (36.9%)             |                     |
| A1 (>0.29)                                      | 402 (26.7%)             |                     |
| A2 (>0.52)                                      | 151 (10.0%)             |                     |
| A3 (>0.62)                                      | 399 (26.4%)             |                     |
| ALT (IU/l) at inclusion                         | 55 [36-90] mean 75      | 1                   |
| Type-2 Diabetes                                 | 163 (10.8%)             | 0                   |
| Arterial hypertension                           | 81 (7.0%)               | 1                   |
| AFP (ng/ml)                                     | 4.4 [3.0-7.6] mean 14.2 | 0                   |
| AFP class (ng/ml)                               |                         | 0                   |

|                               |              |   |
|-------------------------------|--------------|---|
| < 6                           | 1187 (78.6%) |   |
| 6 to <10                      | 178 (11.8%)  |   |
| 10 to <20                     | 86 (5.7%)    |   |
| 20 to <120                    | 45 (3.0%)    |   |
| >120                          | 13 (0.9%)    |   |
| HCV treatment during followup |              | 0 |
| Naive all followup            | 501 (33.2%)  |   |
| SVR                           | 605 (40.1%)  |   |
| Non SVR                       | 403 (26.7%)  |   |

In case of non-normal distribution, the mean is also given along with the median and IQR

**Table S7.** Original-Study updated. Comparison of patients' characteristics between the Low and High -risk populations according to LCR1-LCR2 algorithm (n=1,509)

|                                      | Low Risk             | High Risk              | P value          |
|--------------------------------------|----------------------|------------------------|------------------|
| Number of patients                   | 662                  | 847                    |                  |
| HCC (by F0/F1/F2/F3/F4)              |                      |                        |                  |
| <b>Within 5 years</b>                | <b>1 (1/0/0/0/0)</b> | <b>23 (1/1/4/1/16)</b> | <b>&lt;0.001</b> |
| Within 10 years                      | 4 (3/1/0/0/0)        | 54 (1/3/4/8/38)        | <0.001           |
| End of follow-up                     | 6 (5/1/0/0/0)        | 66 (1/3/4/11/47)       | <0.001           |
| Follow-up years median (IQR)         | 9.4 (9.0-9.7)        | 7.8 (7.3-8.4)          | <0.001           |
| Death (not actuarial)                | 63 (9.5%)            | 224 (26.4%)            | <0.001           |
| Age at inclusion median (IQR)        | 41.8 (40.8-42.8)     | 51.5 (50.8-52.7)       | <0.001           |
| Men                                  | 335 (50.6%)          | 635 (75.4%)            | <0.001           |
| Body mass Index (kg/m <sup>2</sup> ) | 23.5 (22.9-24.2)     | 24.5 (24.2-25.1)       | 0.002            |
| Missing                              | 438                  | 564                    |                  |
| Geographical origin                  |                      |                        | 0.78             |
| France or Eastern Europe             | 448 (67.7 %)         | 575 (67.9%)            |                  |
| Asia                                 | 41 (6.2%)            | 43 (5.1%)              |                  |
| North Africa                         | 89 (13.4%)           | 122 (14.4%)            |                  |
| Other (mostly Sub-Saharan)           | 84 (12.7%)           | 107 (12.6%)            |                  |
| Past excessive alcohol use           | 69 (10.4%)           | 73 (8.6%)              | 0.25             |
| HIV positive                         | 77 (11.6%)           | 116 (13.7%)            | 0.24             |
| HCV genotype                         |                      |                        | 0.07             |
| 1                                    | 264 (52.3%)          | 359 (56.9%)            |                  |
| 2                                    | 49 (9.7%)            | 36 (5.7%)              |                  |
| 3                                    | 83 (16.4%)           | 98 (15.5%)             |                  |
| 4,5,6,7                              | 109 (21.6%)          | 138 (21.9%)            |                  |
| Missing                              | 157                  | 216                    |                  |
| FibroTest stage                      |                      |                        | <0.001           |
| F0                                   | 472 (71.3%)          | 10 (0%)                |                  |
| F1                                   | 167 (25.2%)          | 134 (15.8%)            |                  |
| F2                                   | 18 (2.7%)            | 130 (15.3%)            |                  |
| F3                                   | 5 (0.8%)             | 225 (26.6%)            |                  |
| F4                                   | 0 (0%)               | 348 (41.1%)            |                  |
| Type-2 Diabetes                      | 255 (6.8%)           | 251 (21.9%)            | <0.001           |
| Arterial hypertension                | 820 (21.8%)          | 493 (42.9%)            | <0.001           |
| AFP >= 20ng/ml)                      | 7 (1.1%)             | 51 (6.0%)              | <0.001           |
| Treatment                            |                      |                        | <0.001           |
| Naive                                | 333 (50.3%)          | 168 (19.8%)            |                  |
| Not-SVR                              | 109 (16.5%)          | 296 (34.9%)            |                  |
| SVR                                  | 220 (33.2%)          | 383 (45.2%)            |                  |



**Table S8.** Pooled characteristics for participants of the Hepather validation cohort and those included in the Original-Study of LCR1-LCR2 algorithm

|                                                 | <b>Pooled population</b> | <b>Missing data</b> |
|-------------------------------------------------|--------------------------|---------------------|
| Number of patients                              | 6,412                    | 0                   |
| HCC                                             | 286                      | 0                   |
| LCR1-LCR2 algorithm                             |                          |                     |
| Low risk                                        | 4417 (69.9 %)            | 0                   |
| High risk                                       | 1995 (31.1 %)            | 0                   |
| Follow-up time, median (years)                  | 6.2 [4.4 – 11.7]         | 0                   |
| Age at FibroTest time                           | 51.3 [43.6 – 60.1]       | 0                   |
| Men                                             | 3376 (52.8 %)            | 0                   |
| Body mass Index (kg/m <sup>2</sup> )            | 24.6 [22.1-27.6]         | 201                 |
| Smoker at inclusion                             | 1939 (30.3 %)            | 7                   |
| Geographical origin                             |                          | 1548                |
| France or Eastern Europe                        | 3725 (76.5 %)            |                     |
| Asia                                            | 121 (2.5 %)              |                     |
| North Africa                                    | 509 (10.5 %)             |                     |
| Other (mostly Sub-Saharan)                      | 509 (10.5 %)             |                     |
| Excessive alcohol use at inclusion              | 197 (3.9 %)              | 1316                |
| Time since HCV infection                        |                          |                     |
| HCV genotype                                    |                          | 397                 |
| 1                                               | 3923 (65.2 %)            |                     |
| 2                                               | 417 (6.9 %)              |                     |
| 3                                               | 728 (12.1 %)             |                     |
| 4,5,6,7                                         | 947 (15.8 %)             |                     |
| Fibrosis at inclusion (using FibroTest cutoffs) |                          | 0                   |
| F0 (<=0.21)                                     | 2087 (32.6 %)            |                     |
| F1 (>0.21)                                      | 1399 (21.8 %)            |                     |
| F2 (>0.48)                                      | 620 (9.7 %)              |                     |
| F3 (>0.58)                                      | 1066 (16.6 %)            |                     |
| F4 (>0.74)                                      | 1240 (19.3 %)            |                     |
| Activity grade (ActiTest cutoff)                |                          | 2178                |
| A0 (<=0.29)                                     | 1679 (39.7 %)            |                     |
| A1 (>0.29)                                      | 1175 (27.7 %)            |                     |
| A2 (>0.52)                                      | 392 (9.3 %)              |                     |
| A3 (>0.62)                                      | 988 (23.3 %)             |                     |
| ALT (IU/l) at inclusion                         | 55.0 [37.0-88.0]         | 2173                |
| Type-2 Diabetes                                 | 669 (10.4 %)             | 0                   |
| Arterial hypertension                           | 1438 (22.4 %)            | 1                   |
| AFP (ng/ml)                                     | 3.9 [2.4-6.6]            | 728                 |
| AFP class (ng/ml)                               |                          | 728                 |
| < 6                                             | 4028 (70.9 %)            |                     |
| 6 to <10                                        | 832 (14.6 %)             |                     |

|                                |               |     |
|--------------------------------|---------------|-----|
| 10 to <20                      | 506 (8.9 %)   |     |
| 20 to <120                     | 281 (4.9 %)   |     |
| >120                           | 37 (0.7 %)    |     |
| HCV treatment during follow-up |               |     |
| Naive all follow-up            | 897 (14.0 %)  | 0   |
| SVR                            | 4008 (77.5 %) | 344 |
| Non SVR                        | 1163 (22.5 %) |     |

**Table S9.** STROBE check list.**STROBE Statement—Checklist of items that should be included in reports of *cohort studies***

|                              | <b>Item No</b> | <b>Recommendation</b>                                                                                                                                                                                                                                                                                                  | <b>Page No</b> |
|------------------------------|----------------|------------------------------------------------------------------------------------------------------------------------------------------------------------------------------------------------------------------------------------------------------------------------------------------------------------------------|----------------|
| <b>Title and abstract</b>    | 1              | (a) Indicate the study's design with a commonly used term in the title or the abstract                                                                                                                                                                                                                                 | 3              |
|                              |                | (b) Provide in the abstract an informative and balanced summary of what was done and what was found                                                                                                                                                                                                                    | 3              |
| <b>Introduction</b>          |                |                                                                                                                                                                                                                                                                                                                        |                |
| Background/rationale         | 2              | Explain the scientific background and rationale for the investigation being reported                                                                                                                                                                                                                                   | 5-6            |
| Objectives                   | 3              | State specific objectives, including any prespecified hypotheses                                                                                                                                                                                                                                                       | 6-7            |
| <b>Methods</b>               |                |                                                                                                                                                                                                                                                                                                                        |                |
| Study design                 | 4              | Present key elements of study design early in the paper                                                                                                                                                                                                                                                                | 6-7            |
| Setting                      | 5              | Describe the setting, locations, and relevant dates, including periods of recruitment, exposure, follow-up, and data collection                                                                                                                                                                                        | 6-8            |
| Participants                 | 6              | (a) Give the eligibility criteria, and the sources and methods of selection of participants. Describe methods of follow-up                                                                                                                                                                                             | 7-8            |
|                              |                | (b) For matched studies, give matching criteria and number of exposed and unexposed                                                                                                                                                                                                                                    | NA             |
| Variables                    | 7              | Clearly define all outcomes, exposures, predictors, potential confounders, and effect modifiers. Give diagnostic criteria, if applicable                                                                                                                                                                               | 8-9            |
| Data sources/<br>measurement | 8*             | For each variable of interest, give sources of data and details of methods of assessment (measurement). Describe comparability of assessment methods if there is more than one group                                                                                                                                   | 7-8            |
| Bias                         | 9              | Describe any efforts to address potential sources of bias                                                                                                                                                                                                                                                              | 9              |
| Study size                   | 10             | Explain how the study size was arrived at                                                                                                                                                                                                                                                                              | 10             |
| Quantitative variables       | 11             | Explain how quantitative variables were handled in the analyses. If applicable, describe which groupings were chosen and why                                                                                                                                                                                           |                |
| Statistical methods          | 12             | (a) Describe all statistical methods, including those used to control for confounding<br>(b) Describe any methods used to examine subgroups and interactions<br>(c) Explain how missing data were addressed<br>(d) If applicable, explain how loss to follow-up was addressed<br>(e) Describe any sensitivity analyses | 10-11          |

| <b>Results</b>   |     |                                                                                                                                                                                                                                                                                                 |       |
|------------------|-----|-------------------------------------------------------------------------------------------------------------------------------------------------------------------------------------------------------------------------------------------------------------------------------------------------|-------|
| Participants     | 13* | (a) Report numbers of individuals at each stage of study—eg numbers potentially eligible, examined for eligibility, confirmed eligible, included in the study, completing follow-up, and analysed<br>(b) Give reasons for non-participation at each stage<br>(c) Consider use of a flow diagram | 12    |
| Descriptive data | 14* | (a) Give characteristics of study participants (eg demographic, clinical, social) and information on exposures and potential confounders<br>(b) Indicate number of participants with missing data for each variable of interest<br>(c) Summarise follow-up time (eg, average and total amount)  | 13-14 |
| Outcome data     | 15* | Report numbers of outcome events or summary measures over time                                                                                                                                                                                                                                  | 12-14 |

|                          |    |                                                                                                                                                                                                                                                                                                                                                                                                               |          |
|--------------------------|----|---------------------------------------------------------------------------------------------------------------------------------------------------------------------------------------------------------------------------------------------------------------------------------------------------------------------------------------------------------------------------------------------------------------|----------|
| Main results             | 16 | (a) Give unadjusted estimates and, if applicable, confounder-adjusted estimates and their precision (eg, 95% confidence interval). Make clear which confounders were adjusted for and why they were included<br>(b) Report category boundaries when continuous variables were categorized<br>(c) If relevant, consider translating estimates of relative risk into absolute risk for a meaningful time period | 12-14    |
| Other analyses           | 17 | Report other analyses done—eg analyses of subgroups and interactions, and sensitivity analyses                                                                                                                                                                                                                                                                                                                | 12-14    |
| <b>Discussion</b>        |    |                                                                                                                                                                                                                                                                                                                                                                                                               |          |
| Key results              | 18 | Summarise key results with reference to study objectives                                                                                                                                                                                                                                                                                                                                                      | 16-17    |
| Limitations              | 19 | Discuss limitations of the study, taking into account sources of potential bias or imprecision. Discuss both direction and magnitude of any potential bias                                                                                                                                                                                                                                                    | 18       |
| Interpretation           | 20 | Give a cautious overall interpretation of results considering objectives, limitations, multiplicity of analyses, results from similar studies, and other relevant evidence                                                                                                                                                                                                                                    | 16-18    |
| Generalisability         | 21 | Discuss the generalisability (external validity) of the study results                                                                                                                                                                                                                                                                                                                                         | 18       |
| <b>Other information</b> |    |                                                                                                                                                                                                                                                                                                                                                                                                               |          |
| Funding                  | 22 | Give the source of funding and the role of the funders for the present study and, if applicable, for the original study on which the present article is based                                                                                                                                                                                                                                                 | 2 and 12 |

\*Give information separately for exposed and unexposed groups.

**Note:** An Explanation and Elaboration article discusses each checklist item and gives methodological background and published examples of transparent reporting. The STROBE checklist is best used in conjunction with this article (freely available on the Web sites of PLoS Medicine at <http://www.plosmedicine.org/>, Annals of Internal Medicine at <http://www.annals.org/>, and Epidemiology at <http://www.epidem.com/>). Information on the STROBE Initiative is available at <http://www.strobe-statement.org>.

Table S10. STARD check list.

| Section & Topic          | No         | Item                                                                                                                                                  | Reported on page # |
|--------------------------|------------|-------------------------------------------------------------------------------------------------------------------------------------------------------|--------------------|
| <b>TITLE OR ABSTRACT</b> |            |                                                                                                                                                       |                    |
|                          | <b>1</b>   | Identification as a study of diagnostic accuracy using at least one measure of accuracy (such as sensitivity, specificity, predictive values, or AUC) | 3                  |
| <b>ABSTRACT</b>          |            |                                                                                                                                                       |                    |
|                          | <b>2</b>   | Structured summary of study design, methods, results, and conclusions (for specific guidance, see STARD for Abstracts)                                | 3-4                |
| <b>INTRODUCTION</b>      |            |                                                                                                                                                       |                    |
|                          | <b>3</b>   | Scientific and clinical background, including the intended use and clinical role of the index test                                                    | 5                  |
|                          | <b>4</b>   | Study objectives and hypotheses                                                                                                                       | 6                  |
| <b>METHODS</b>           |            |                                                                                                                                                       |                    |
| <i>Study design</i>      | <b>5</b>   | Whether data collection was planned before the index test and reference standard were performed (prospective study) or after (retrospective study)    | 6-8                |
| <i>Participants</i>      | <b>6</b>   | Eligibility criteria                                                                                                                                  | 6-7                |
|                          | <b>7</b>   | On what basis potentially eligible participants were identified (such as symptoms, results from previous tests, inclusion in registry)                | 6-7                |
|                          | <b>8</b>   | Where and when potentially eligible participants were identified (setting, location and dates)                                                        | 7                  |
|                          | <b>9</b>   | Whether participants formed a consecutive, random or convenience series                                                                               | 7-8                |
| <i>Test methods</i>      | <b>10a</b> | Index test, in sufficient detail to allow replication                                                                                                 | 5                  |
|                          | <b>10b</b> | Reference standard, in sufficient detail to allow replication                                                                                         | 8-9                |
|                          | <b>11</b>  | Rationale for choosing the reference standard (if alternatives exist)                                                                                 | 9                  |
|                          | <b>12a</b> | Definition of and rationale for test positivity cut-offs or result categories of the index test, distinguishing pre-specified from exploratory        | 10-11              |
|                          | <b>12b</b> | Definition of and rationale for test positivity cut-offs or result categories                                                                         | 10-11              |

|                          |            |                                                                                                                        |       |
|--------------------------|------------|------------------------------------------------------------------------------------------------------------------------|-------|
|                          |            | of the reference standard, distinguishing pre-specified from exploratory                                               |       |
|                          | <b>13a</b> | Whether clinical information and reference standard results were available to the performers/readers of the index test | 10-11 |
|                          | <b>13b</b> | Whether clinical information and index test results were available to the assessors of the reference standard          | 10-11 |
| <i>Analysis</i>          | <b>14</b>  | Methods for estimating or comparing measures of diagnostic accuracy                                                    | 10-11 |
|                          | <b>15</b>  | How indeterminate index test or reference standard results were handled                                                | 10-11 |
|                          | <b>16</b>  | How missing data on the index test and reference standard were handled                                                 | 10-11 |
|                          | <b>17</b>  | Any analyses of variability in diagnostic accuracy, distinguishing pre-specified from exploratory                      | 10-11 |
|                          | <b>18</b>  | Intended sample size and how it was determined                                                                         | 10    |
| <b>RESULTS</b>           |            |                                                                                                                        |       |
| <i>Participants</i>      | <b>19</b>  | Flow of participants, using a diagram                                                                                  | 12    |
|                          | <b>20</b>  | Baseline demographic and clinical characteristics of participants                                                      | 12    |
|                          | <b>21a</b> | Distribution of severity of disease in those with the target condition                                                 | 12-13 |
|                          | <b>21b</b> | Distribution of alternative diagnoses in those without the target condition                                            | 13-14 |
|                          | <b>22</b>  | Time interval and any clinical interventions between index test and reference standard                                 | 12-14 |
| <i>Test results</i>      | <b>23</b>  | Cross tabulation of the index test results (or their distribution) by the results of the reference standard            | 12-14 |
|                          | <b>24</b>  | Estimates of diagnostic accuracy and their precision (such as 95% confidence intervals)                                | 12-14 |
|                          | <b>25</b>  | Any adverse events from performing the index test or the reference standard                                            | NA    |
| <b>DISCUSSION</b>        |            |                                                                                                                        |       |
|                          | <b>26</b>  | Study limitations, including sources of potential bias, statistical uncertainty, and generalisability                  | 17-18 |
|                          | <b>27</b>  | Implications for practice, including the intended use and clinical role of the index test                              | 16-18 |
| <b>OTHER INFORMATION</b> |            |                                                                                                                        |       |
|                          | <b>28</b>  | Registration number and name of registry                                                                               | 4; 8  |

---

|  |                                                                 |                 |
|--|-----------------------------------------------------------------|-----------------|
|  | <b>29</b> Where the full study protocol can be accessed         | 7 (reference 7) |
|  | <b>30</b> Sources of funding and other support; role of funders | 2; 12           |

---
